# Supplementary material
Source: MDPI journal article supplement (https://www.mdpi.com/2073-4441/12/9/2515)
Supplement: s1 [file s1]

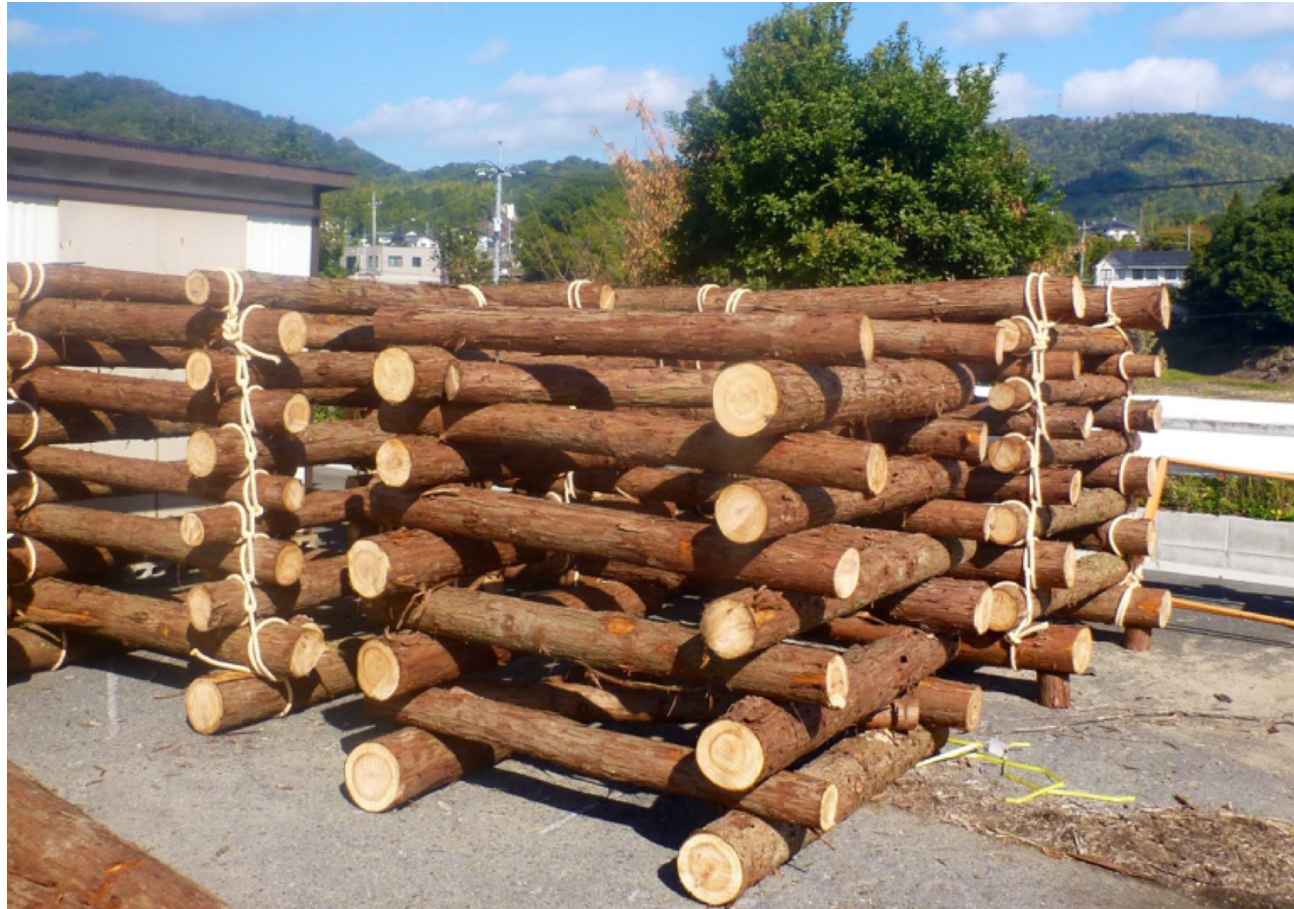

**Figure S1.** Photograph of ARs construction made of thinning timbers

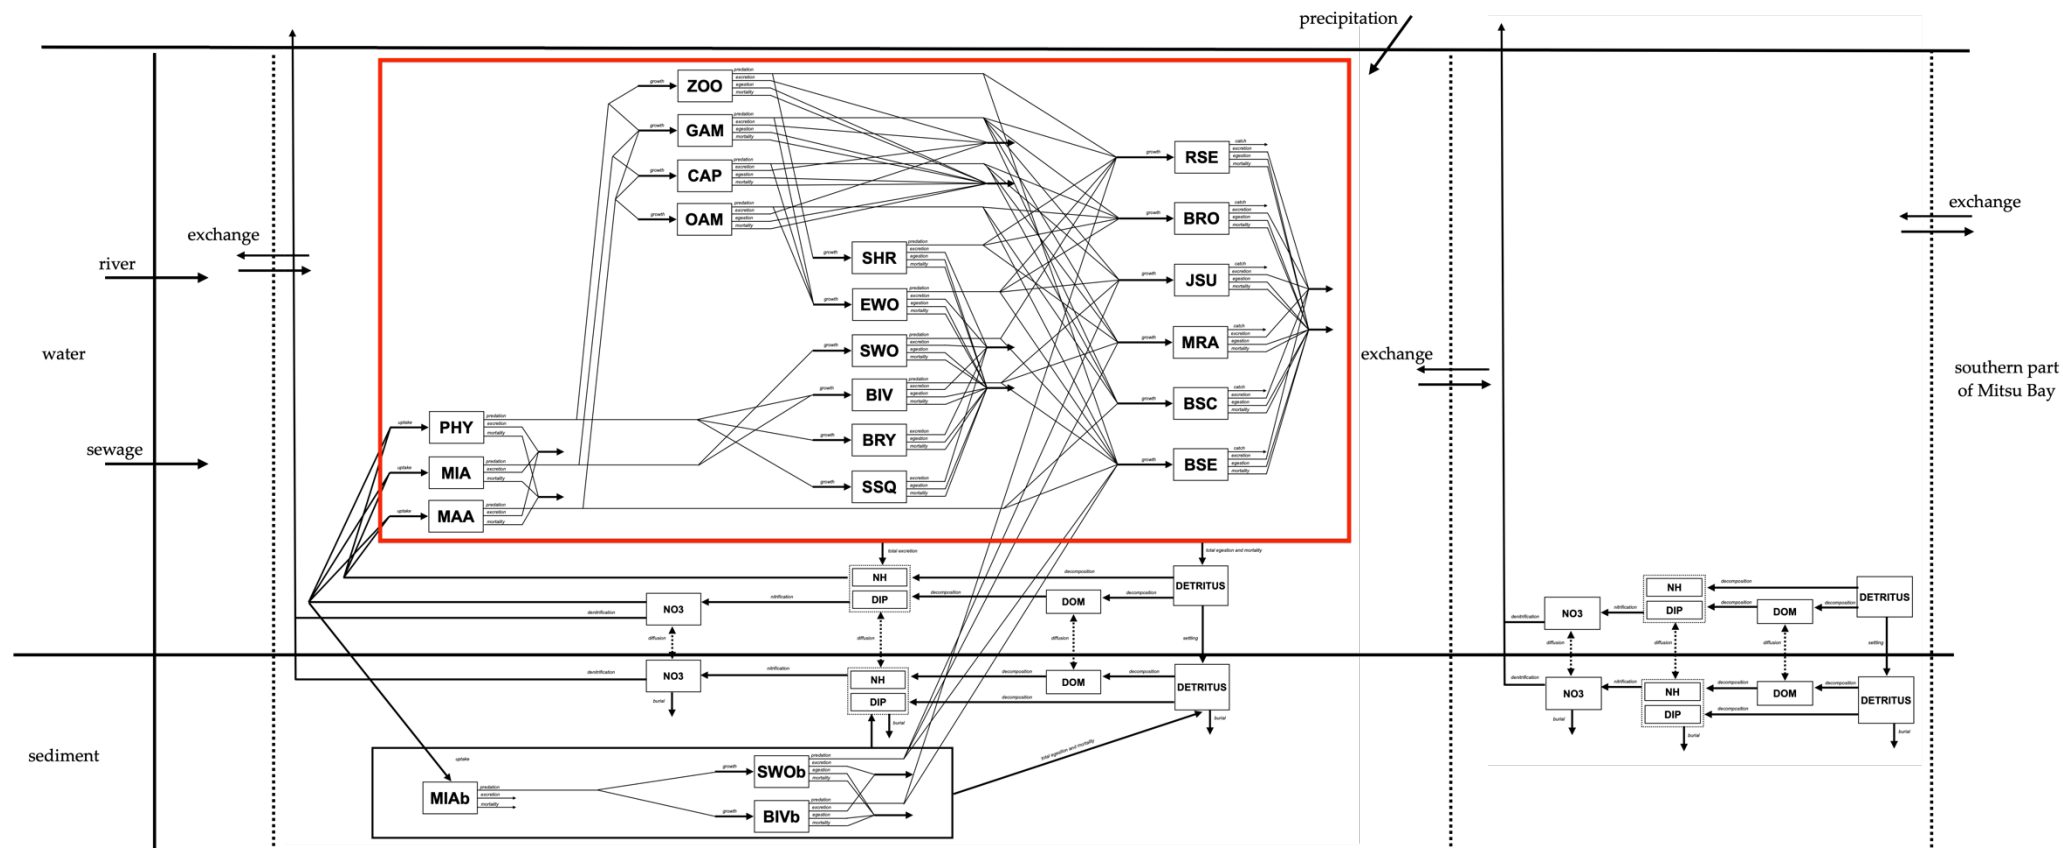

**Figure S2.** Illustration of food webs in ATRs system (red square) and P and N cycles in the ATR area. Subscripts and abbreviations: micro algae (MIA), macro algae (MAA), benthic micro algae (MIAb), zooplankton (ZOO), shrimp (SHR), bivalves (BIV), benthic bivalves (BIVb), sedentary worm (SWO), benthic sedentary worm (SWOb), errant worm (EWO), bryozoan (BRY), sea squirt (SSQ), gammarid (GAM), caprellid (CAP), other amphipods (OAM), black seabream *Acanthopagrus schlegelii* (BSE), black rockfish *Sebastes inermis* (BRO), Japanese surfperch *Ditrema temminckii* (JSU), Multicolorfin rainbowfish *Parajulis poecilopterus* (MRA), Black scraper *Thamnaconus modestus* (BSC) and Red seabream *Pagrus major* (RSE), grazing (graz), nutrient uptake (uptake), total feed on prey biomass (feed), natural mortality (mortal), excretion (exc), egestion (fae), biomass eaten by others predation (eat), fishermen catch (catch).

**Table S1.** Standard setting for model runs

|                    |                   |                                              | Remarks                                      |
|--------------------|-------------------|----------------------------------------------|----------------------------------------------|
| Initial conditions | DIP               | 5 mg P m <sup>-3</sup>                       | [1]                                          |
|                    | DOP               | 10 mg P m <sup>-3</sup>                      | [1]                                          |
|                    | DET-P             | 8 mg P m <sup>-3</sup>                       | [1]                                          |
|                    | Nitrate           | 20 mg N m <sup>-3</sup>                      | [1]                                          |
|                    | Ammonia           | 10 mg N m <sup>-3</sup>                      | [1]                                          |
|                    | DON               | 100 mg N m <sup>-3</sup>                     | [1]                                          |
|                    | DET-N             | 20 mg N m <sup>-3</sup>                      | [1]                                          |
|                    | Phytoplankton     | 5 mg P m <sup>-3</sup>                       | [2]                                          |
|                    | Attached algae    | 0.01 mg P m <sup>-3</sup>                    | assumed to be low before<br>ATRs deployment  |
|                    | Attached organism | 0.01 mg P m <sup>-3</sup>                    | assumed to be zero before<br>ATRs deployment |
| Loads              | Benthic organisms | 20 mg P m <sup>-3</sup>                      | initial biomass observation                  |
|                    | Fish              | 40 mg P m <sup>-3</sup>                      | initial biomass observation                  |
|                    | Rain DIP          | 0.003 mg P m <sup>-3</sup> day <sup>-1</sup> | [3]                                          |
|                    | Rain nitrate      | 0.06 mg N m <sup>-3</sup> day <sup>-1</sup>  | [3]                                          |
|                    | Rain ammonia      | 0.11 mg N m <sup>-3</sup> day <sup>-1</sup>  | [3]                                          |
|                    | River DIP         | 0.002 mg P m <sup>-3</sup> day <sup>-1</sup> | [4]                                          |
|                    | River DOP         | 0.001 mg P m <sup>-3</sup> day <sup>-1</sup> | [4]                                          |
|                    | River DET-P       | 0.001 mg P m <sup>-3</sup> day <sup>-1</sup> | [4]                                          |
|                    | River nitrate     | 0.029 mg N m <sup>-3</sup> day <sup>-1</sup> | [4]                                          |
|                    | River Ammonia     | 0.02 mg N m <sup>-3</sup> day <sup>-1</sup>  | [4]                                          |
|                    | River DON         | 0.01 mg N m <sup>-3</sup> day <sup>-1</sup>  | [4]                                          |
|                    | River DET-N       | 0.01 mg N m <sup>-3</sup> day <sup>-1</sup>  | [4]                                          |
|                    | Sewage DIP        | 0.002 mg P m <sup>-3</sup> day <sup>-1</sup> | [4]                                          |
|                    | Sewage DOP        | 0.001 mg P m <sup>-3</sup> day <sup>-1</sup> | [4]                                          |
|                    | Sewage DET-P      | 0.001 mg P m <sup>-3</sup> day <sup>-1</sup> | [4]                                          |
|                    | Sewage nitrate    | 0.007 mg N m <sup>-3</sup> day <sup>-1</sup> | [4]                                          |
|                    | Sewage ammonia    | 0.005 mg N m <sup>-3</sup> day <sup>-1</sup> | [4]                                          |
|                    | Sewage DON        | 0.002 mg N m <sup>-3</sup> day <sup>-1</sup> | [4]                                          |
|                    | Sewage DET-N      | 0.002 mg N m <sup>-3</sup> day <sup>-1</sup> | [4]                                          |

**Reference:**

1. IDEA Consultants Inc. Report on the project to improve material cycle in the sea to healthy condition. The commissioned project by Ministry of the Environment, Japan (in Japanese with English abstract). **2013**, 192 pp.
2. Kittiwonich, J.; Yamamoto, T.; Kawaguchi, O.; Hashimoto, T. Analyses of phosphorus and nitrogen cyclings in the estuarine ecosystem of Hiroshima Bay by a pelagic and benthic coupled model. *Estuar. Coast Shelf Sci.* **2007**, *75*, 189–204.
3. Japan Meteorological Agency. Available online: [http://www.data.jma.go.jp/obd/stats/etrn/index.php?prec\\_no=67&block\\_no=0686&year=2018&month=1&day=&view=p3](http://www.data.jma.go.jp/obd/stats/etrn/index.php?prec_no=67&block_no=0686&year=2018&month=1&day=&view=p3) (accessed on 20 February 2020).
4. Sanyo Techno Marine. The Report on the Contract Project by the Ministry of the Environment Japan, “Healthy Plan for Sea Area” (Mitsu Bay), FY2013. **2014**.
